# Supplementary material
Source: PubMed Central journal article supplement (PMC4807730)

# Supplemental Figure 1

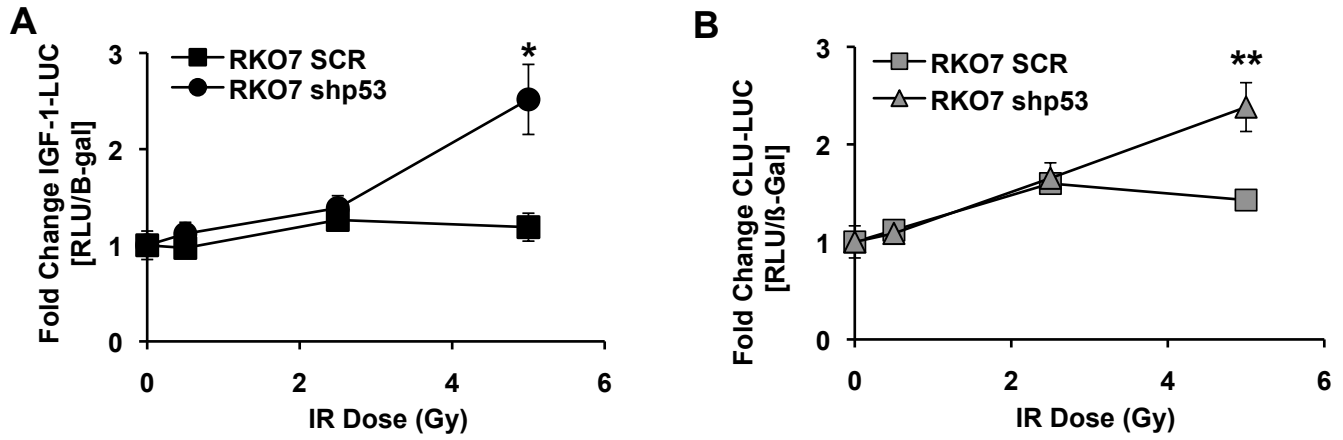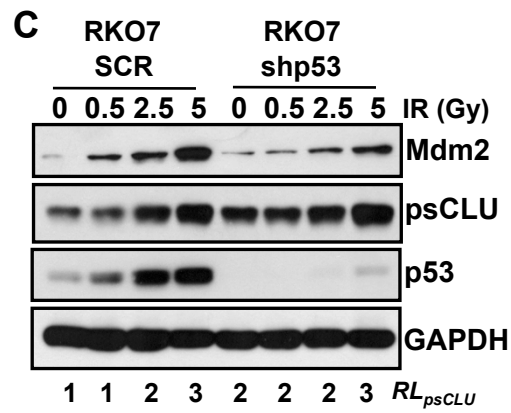

## Supplemental Figure 2

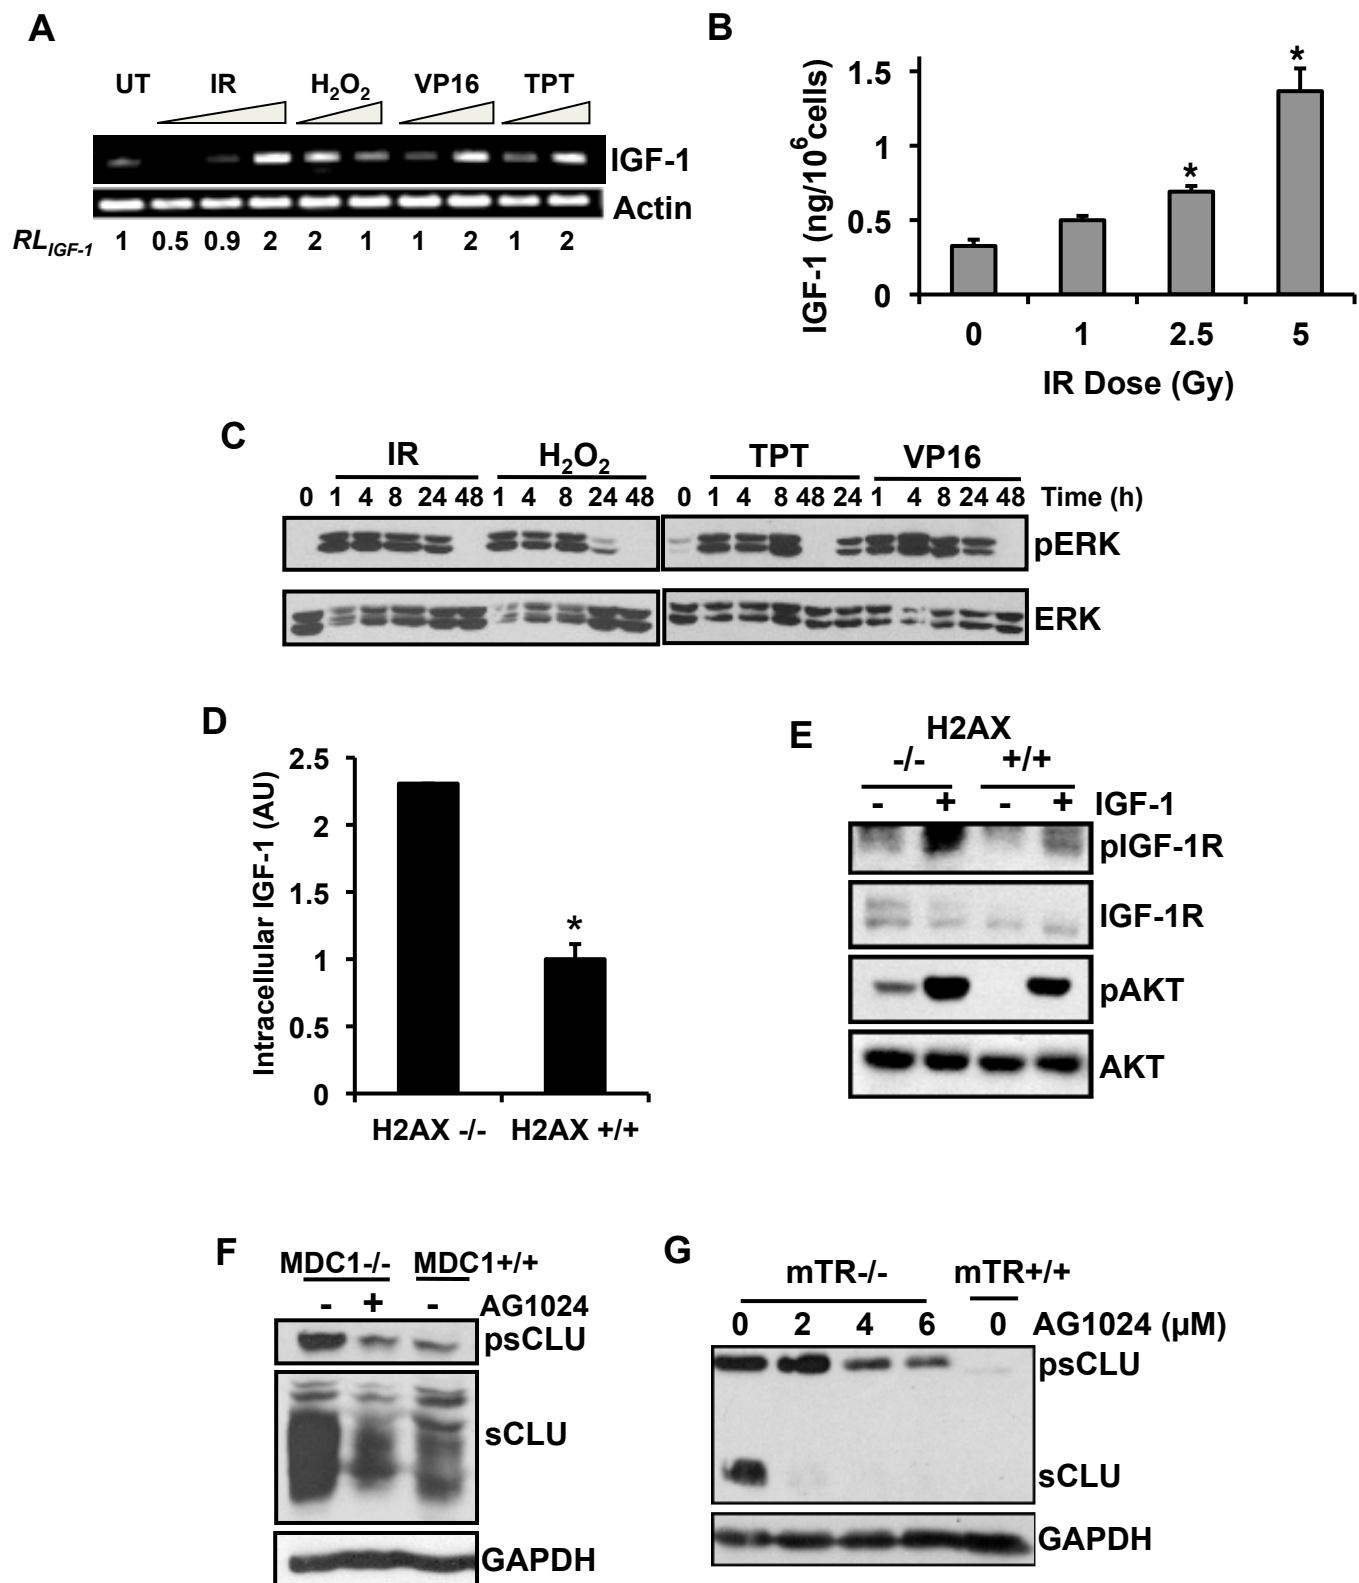

# Supplemental Figure 3

**A**

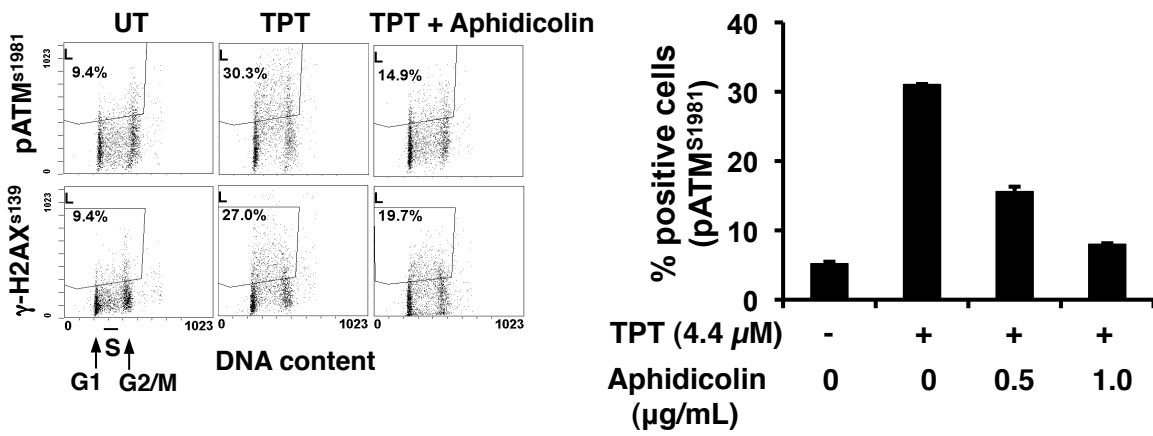

**B** H2AX MDC1 mTR

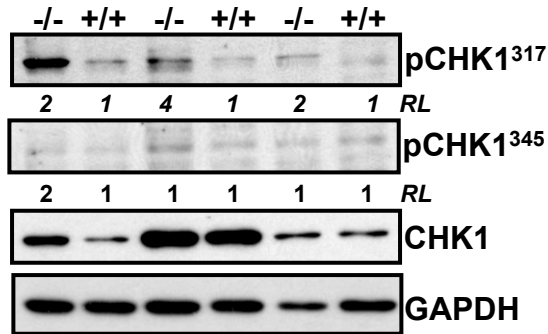

# Supplemental Figure 4

## A MCF-7

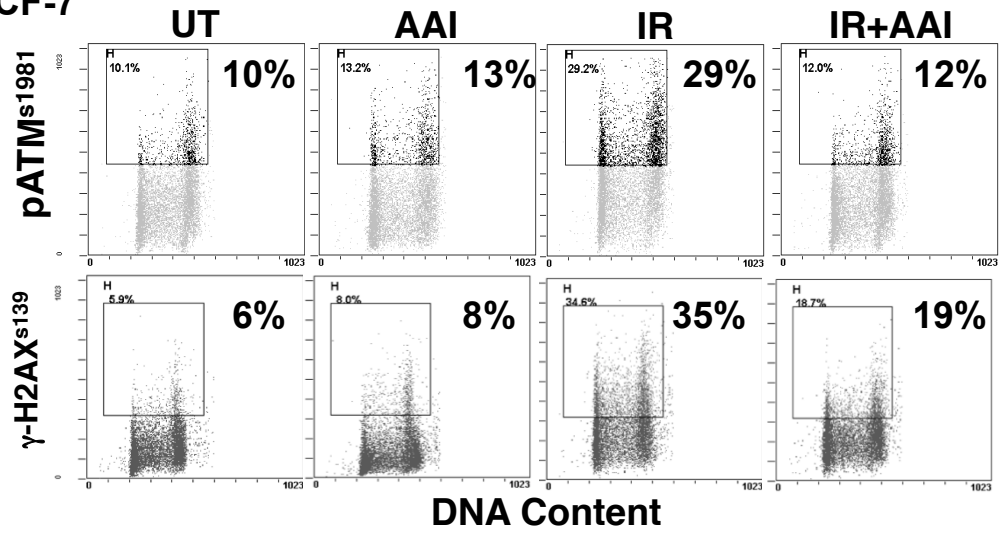

## B mTR+/+

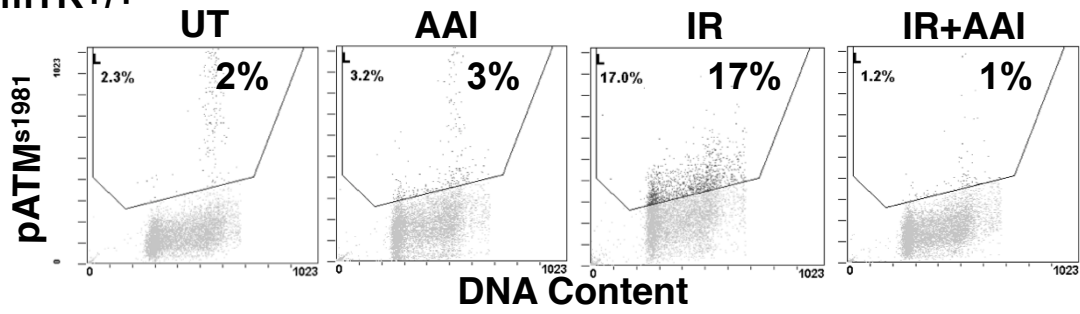

## Supplemental Figure 5

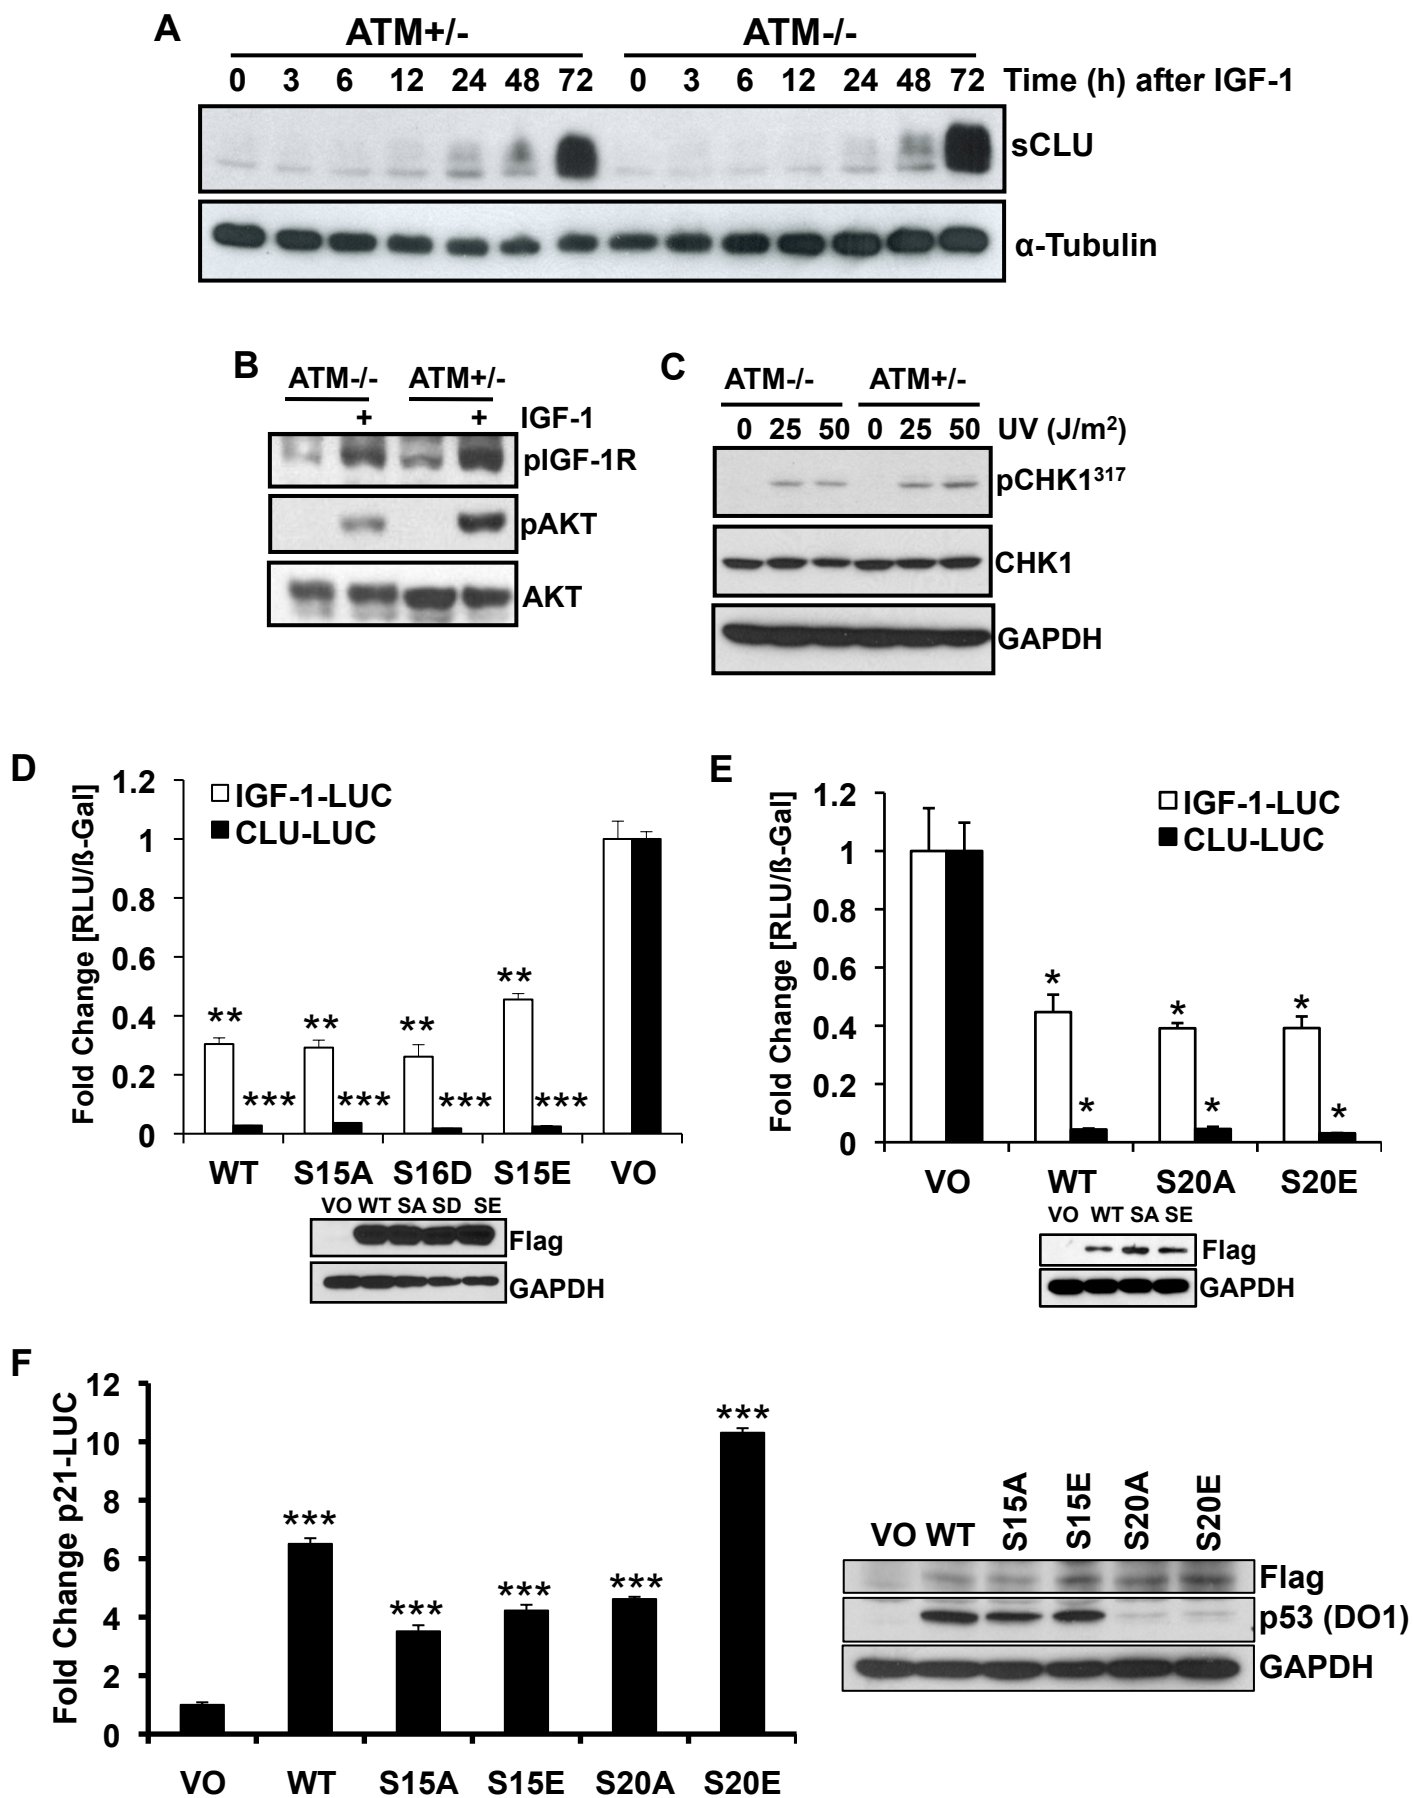

Supplement: NIHMS768050-supplement-supple_data.pdf [file NIHMS768050-supplement-supple_data.pdf]
